# Supplementary material for: MoTe2/InN van der Waals heterostructures for gas sensors: a DFT study
Source: Royal Society of Chemistry journal article supplement (doi:10.1039/d3cp02906a), 2023-01-01
Supplement: d3cp02906a6.pdf [file d3cp02906a6.pdf]

## Supporting Information

### MoTe<sub>2</sub>/InN van der Waals Heterostructures for Gas Sensors: A DFT Study

Jaafar Abdul-Aziz Mehrez<sup>a</sup>, Xiyu Chen<sup>a</sup>, Min Zeng<sup>a,\*</sup>, Jianhua Yang<sup>a</sup>, Nantao Hu<sup>a</sup>, Tao Wang<sup>a</sup>, Ruili Liu<sup>a</sup>, Lin Xu<sup>b</sup>, Yorexis González-Alfaro<sup>c</sup>, and Zhi Yang<sup>a,\*</sup>

<sup>a</sup> Key Laboratory of Thin Film and Microfabrication (Ministry of Education), Department of Micro/Nano Electronics, School of Electronics Information and Electrical Engineering, Shanghai Jiao Tong University, Shanghai 200240, People's Republic of China

<sup>b</sup> Department of Ophthalmology, Shanghai General Hospital (Shanghai First People's Hospital), Shanghai Jiao Tong University School of Medicine; National Clinical Research Centre for Eye Diseases; Shanghai Key Laboratory of Ocular Fundus Diseases; Shanghai Engineering Centre for Visual Science and Photomedicine, Shanghai 200080, People's Republic of China

<sup>c</sup> Centre for Advanced Studies of Cuba, Havana, Cuba

\* Corresponding authors: Min Zeng (E-mail: minzeng@sjtu.edu.cn) and Zhi Yang (E-mail: zhiyang@sjtu.edu.cn)

#### Contents

- Figure S1. (Top/side view) Possible adsorption configurations of adsorbed gas molecules on top of the MoTe<sub>2</sub>/InN vdW heterostructure.
- Figure S2. Most favorable adsorption sites of NO<sub>2</sub> on top of individual MoTe<sub>2</sub> and InN monolayers
- Figure S3. Total and partial density of states for pristine MoTe<sub>2</sub>/InN vdW heterostructure before the adsorption of gas molecules
- Table S1. Calculated adsorption energy ( $E_{ads}$ ), the shortest distance between gas molecules and the adsorbent ( $d$ ), and net Bader charge on the adsorbed gas molecules.
- Table S2. Favorable adsorption site, calculated adsorption energy ( $E_{ads}$ ), the shortest distance between NO<sub>2</sub> and the adsorbent ( $d$ ), charge transfer, and the magnetic moment upon adsorption of NO<sub>2</sub> on individual MoTe<sub>2</sub> and InN monolayers.

- Table S3. The band gap ( $E_g$ ), and effective masses of electron ( $m_e^*$ ) and hole carriers ( $m_h^*$ ) of MoTe<sub>2</sub>/InN vdW heterostructure with various adsorbed gas molecules.
- Appendix A: Representative VASP input files used for geometrical relaxation of NO<sub>2</sub>



adsorbed on MoTe<sub>2</sub>/InN vdW heterostructure.

**Figure S1.** (Top/side view) Possible adsorption configurations of (a-c) CO, (d-f) NH<sub>3</sub>, (g-i) NO<sub>2</sub>, (j-l) NO, and (m-o) SO<sub>2</sub> gas molecules on top of the MoTe<sub>2</sub>/InN vdW heterostructure. The possible adsorption sites are T<sub>N</sub>, Hollow site, along with possible orientations on T<sub>In</sub> (Atom colour code purple, Mo; light-brown, Te; pink, In; white, N)



**Figure S2.** (Top/side view) The most energetically favourable adsorption configurations of NO<sub>2</sub> gas molecule on (a) MoTe<sub>2</sub> and (b) InN individual monolayer surfaces. (Atom colour code purple, Mo; light-brown, Te; pink, In; white, N; red, O)



**Figure S3.** Total density of states (TDOS) and partial density of states (PDOS) for pristine MoTe<sub>2</sub>/InN vdW heterostructure before the adsorption of gas molecules. (Note: Fermi level has been shifted to zero)

**Table S1.** Calculated adsorption energy ( $E_{ads}$ ), the shortest distance between gas molecules and the adsorbent ( $d$ ), and net Bader charge on the gas molecule (positive/negative sign of charge transfer denotes the transfer direction from/to the heterostructure).

| Gas Molecule    | Adsorption Site       | $E_{ads}$ (eV) | $d$ (Å) | $\Delta Q$ (e) |
|-----------------|-----------------------|----------------|---------|----------------|
| CO              | T <sub>(N)</sub>      | -0.21          | 2.90    | + 0.01         |
|                 | T <sub>(Hollow)</sub> | -0.18          | 3.02    | + 0.008        |
|                 | Orientation           | -0.13          | 3.19    | + 0.002        |
| NH <sub>3</sub> | T <sub>(N)</sub>      | -0.97          | 2.73    | -0.078         |
|                 | T <sub>(Hollow)</sub> | -0.94          | 2.86    | -0.069         |
|                 | Orientation           | -0.90          | 2.94    | -0.061         |
| NO <sub>2</sub> | T <sub>(N)</sub>      | -0.51          | 3.41    | + 0.32         |
|                 | T <sub>(Hollow)</sub> | -0.84          | 2.42    | + 0.48         |
|                 | Orientation           | -0.55          | 3.30    | + 0.33         |
| NO              | T <sub>(N)</sub>      | -0.21          | 3.14    | + 0.07         |
|                 | T <sub>(Hollow)</sub> | -0.19          | 3.12    | + 0.068        |
|                 | Orientation           | -0.16          | 3.31    | + 0.063        |
| SO <sub>2</sub> | T <sub>(In)</sub>     | -2.09          | 2.25    | + 0.21         |
|                 | T <sub>(Hollow)</sub> | -0.93          | 2.65    | + 0.13         |
|                 | Orientation           | -0.24          | 3.32    | + 0.07         |

**Table S2.** Favourable adsorption site, calculated adsorption energy ( $E_{ads}$ ), the shortest distance between  $\text{NO}_2$  and the adsorbent ( $d$ ), net Bader charge on the  $\text{NO}_2$  gas molecule (positive/negative sign of charge transfer denotes the transfer direction from/to the monolayer), and the magnetic moment upon adsorption of  $\text{NO}_2$  on individual  $\text{MoTe}_2$  and  $\text{InN}$  monolayers.

| Substrate       | Adsorption site | $E_{ads}$ (eV) | $d$ (Å) | $\Delta Q$ (e) | Magnetic moment ( $\mu\text{B}$ ) |
|-----------------|-----------------|----------------|---------|----------------|-----------------------------------|
| $\text{MoTe}_2$ | $\text{T}_{Te}$ | -0.39          | 2.79    | + 0.32         | + 0.9999                          |
| $\text{InN}$    | $\text{T}_{In}$ | -0.55          | 2.2     | -0.62          | -0.9999                           |

**Table S3.** The band gap ( $E_g$ ), and effective masses of electron ( $m_e^*$ ) and hole carriers ( $m_h^*$ ) of

| Gas molecule    | $E_g$ (eV) | $m_e^*(m_0)$     |                 | $m_h^*(m_0)$     |                |         |                          |
|-----------------|------------|------------------|-----------------|------------------|----------------|---------|--------------------------|
|                 |            | K-M ( $\Gamma$ ) | $[\Gamma, M]-M$ | K-M ( $\Gamma$ ) | $\Gamma-M$ (K) | [M,K]-M | [k, $\Gamma$ ]- $\Gamma$ |
| Pristine        | 0.52       | 0.43 (0.42)      | —               | 1.41 (1.36)      | —              | —       | —                        |
| CO              | 0.67       | 0.43 (0.42)      | —               | 1.52 (1.39)      | —              | —       | —                        |
| NH <sub>3</sub> | 0.97       | 0.45 (0.44)      | —               | —                | 2.31 (2.10)    | —       | —                        |
| NO <sub>2</sub> | 0.87       | 0.44 (0.43)      | —               | —                | —              | —       | 9.52                     |
| NO              | 0.78       | —                | 0.43            | —                | —              | 1.77    | —                        |
| SO <sub>2</sub> | 0.99       | 0.47 (0.45)      | —               | —                | 1.19 (1.52)    | —       | —                        |

MoTe<sub>2</sub>/InN vdW heterostructure with various adsorbed gas molecules.

**Appendix A.** Representative VASP INCAR file (geometrical relaxation of NO<sub>2</sub> on the surface of MoTe<sub>2</sub>/InN vdW heterostructure, 4 × 4 unit cell)

Global Parameters

```

SYSTEM = MoTe2InN_NO2_4x4x1 (Title string)
ISTART = 0 (Starting job, begin from scratch)
ICHARG = 2 (Take superposition of initial atomic charge densities)
ISPIN. = 2 (Spin polarized DFT)
LREAL = .F. (Projection is done in reciprocal space)
PREC = Accurate (Precision level)
LWAVE = .T. (Write WAVECAR to the file)
LCHARG = .T. (Write CHGCAR to the file)
ADDGRID = .T. (Increase grid to help GGA convergence)

```

Electronic Relaxation

```

NELM = 100 (Max number of electronic SCF steps)
EDIFF = 1E-4 (SCF energy convergence in eV)
ENCUT = 450 (cut-off energy of plane wave basis set in eV)
ALGO = Fast (robust mixture of the Davidson and RMM-DIIS algorithms)
ISMEAR = 0 (Gaussian smearing)
SIGMA = 0.2 (width of the smearing in eV)

```

Ionic Relaxation

```

NSW = 300 (Max ionic steps or iterations)
EDIFFG = -0.01 (Ionic convergence eV/AA)
IBRION = 2 (Ionic relaxation conjugate gradient algorithm)
ISIF = 4 (lattice/atomic coordinates relaxation, fixed volume)
ISYM = 2 (Memory conserving symmetrization of the charge density)
POTIM = 0.5

```

vdW Corrections

GGA = OR (optPBE exchange & PBE correlation)

LUSE\_VDW = .T. (switches on the use of a nonlocal vdW-DF functional)

AGGAC = 0.0

LASPH = .T. (non-spherical contributions from the gradient corrections)
