# Supplementary figures and images for: MoTe2/InN van der Waals heterostructures for gas sensors: a DFT study
Source: Royal Society of Chemistry journal article supplement (doi:10.1039/d3cp02906a), 2023-01-01

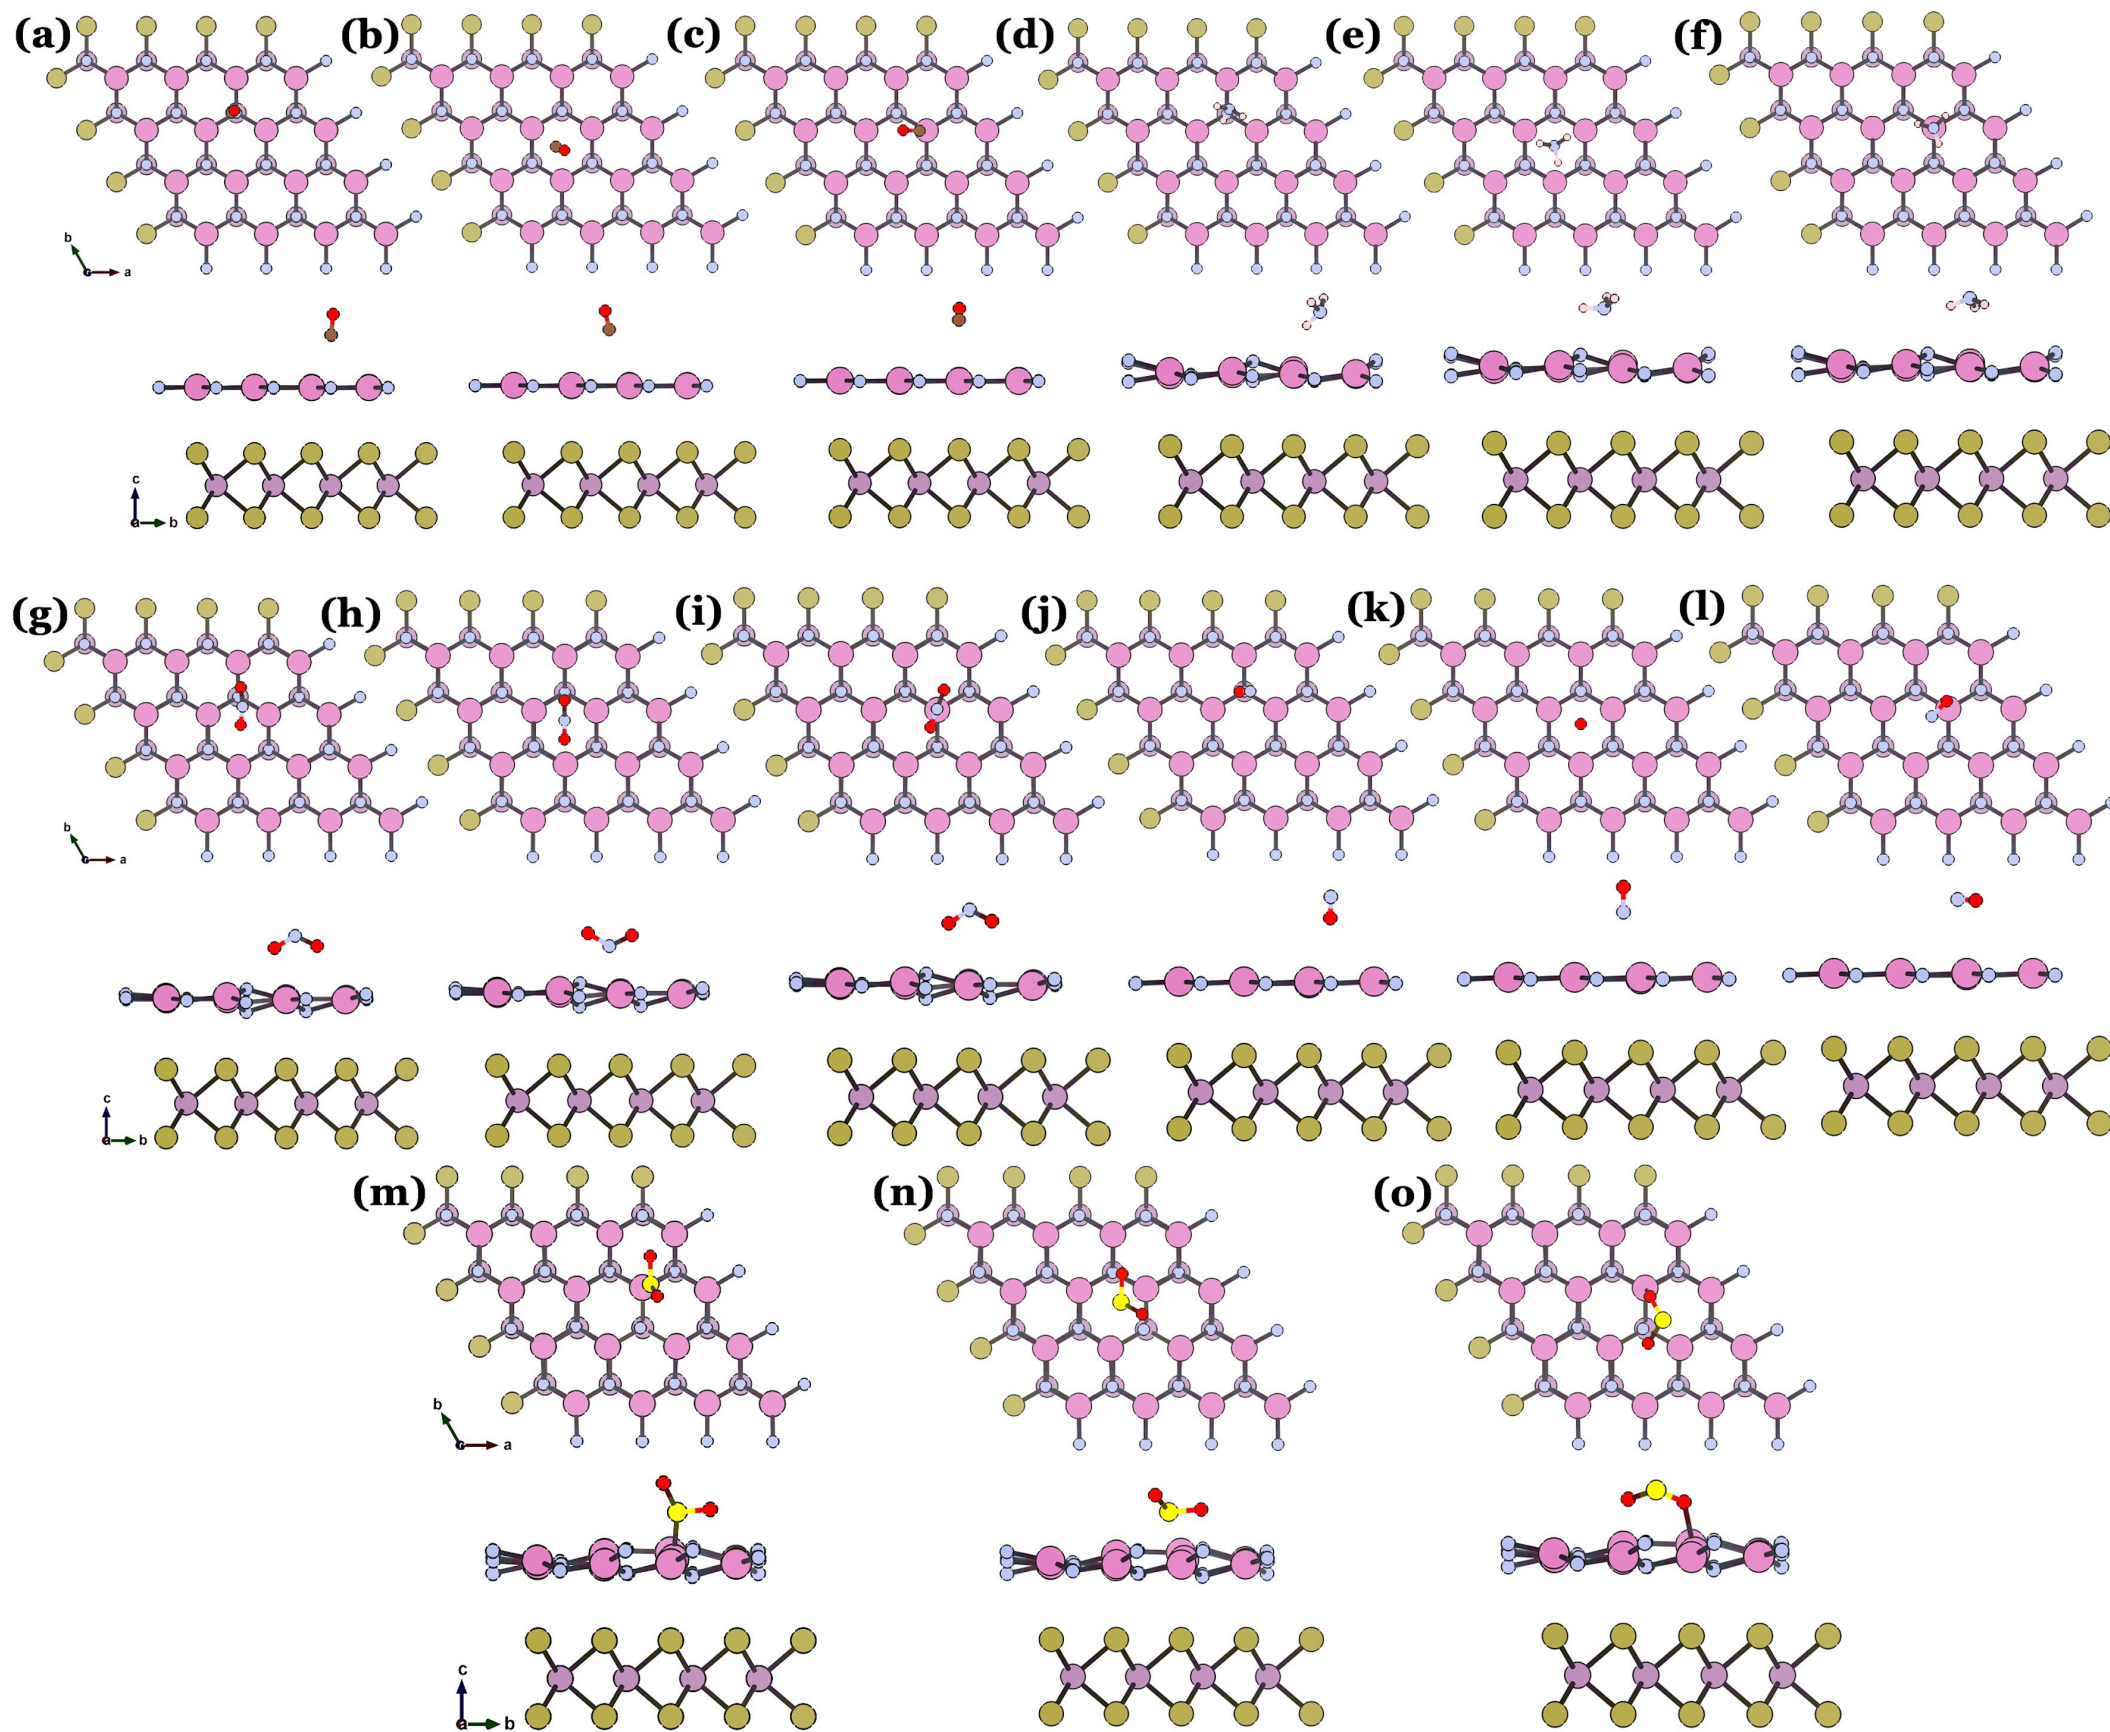

Supplement: d3cp02906a2.pdf [file d3cp02906a2.pdf]

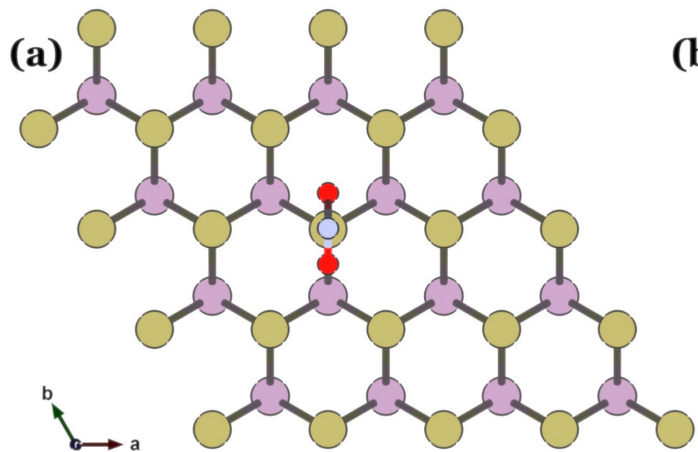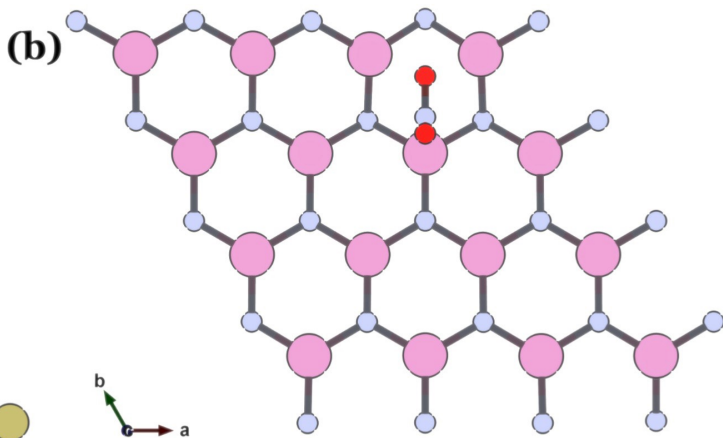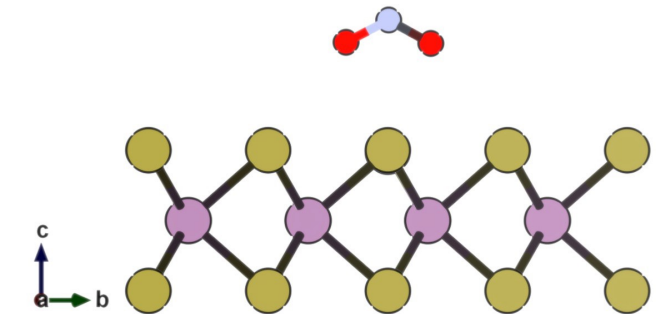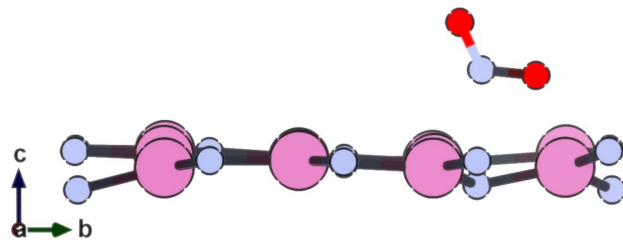

Supplement: d3cp02906a3.pdf [file d3cp02906a3.pdf]

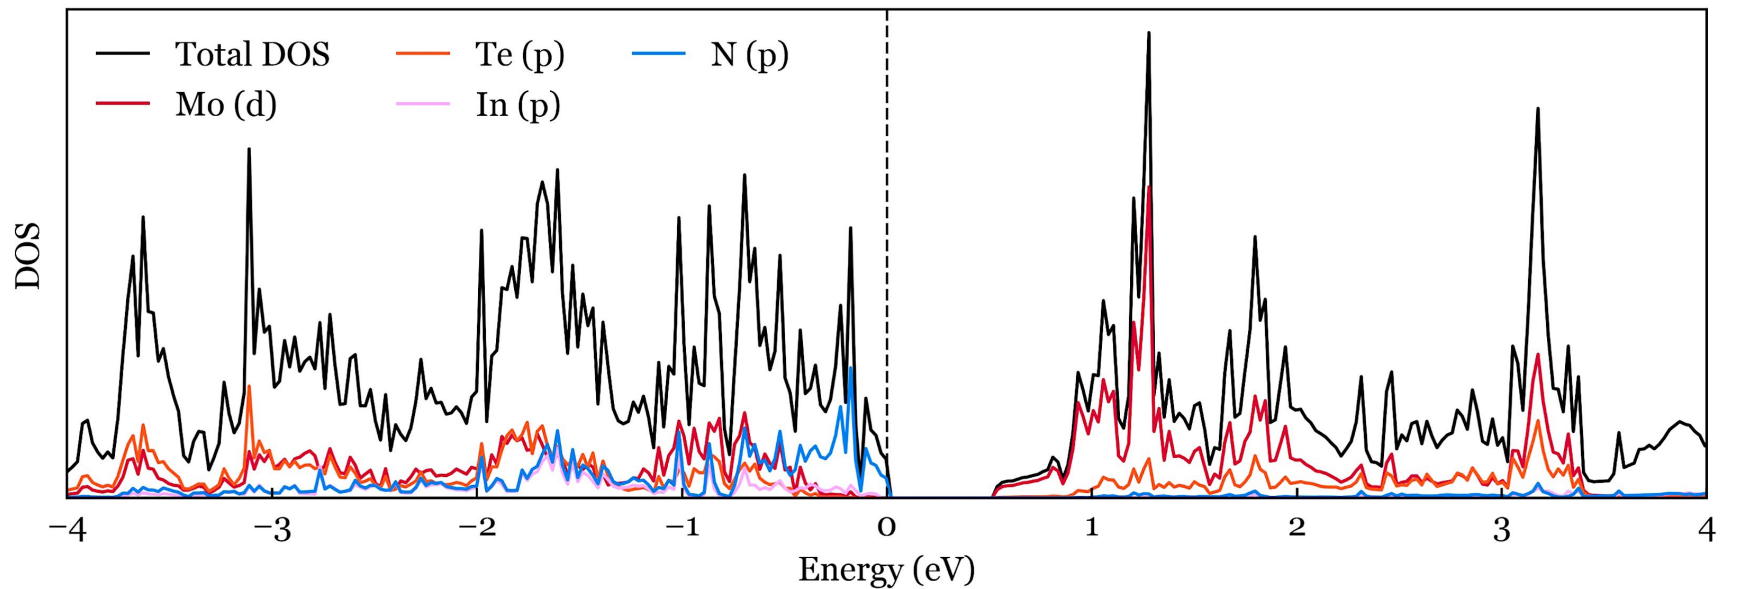

Supplement: d3cp02906a4.pdf [file d3cp02906a4.pdf]
